# Supplementary material for: Composition and Antibacterial Activity of the Essential Oil from Pimenta dioica (L.) Merr. from Guatemala
Source: PubMed Central journal article supplement (PMC7597960; doi:10.3390/medicines7100059), 2020-09-23
Supplement: medicines-07-00059-s001.pdf [file medicines-07-00059-s001.pdf]

# Supplementary Materials: Composition and Antibacterial Activity of the Essential Oil from *Pimenta dioica* (L.) Merr. from Guatemala

Max Samuel Mérida-Reyes, Manuel Alejandro Muñoz-Wug, Bessie Evelyn Oliva-Hernández, Isabel Cristina Gaitán-Fernández, Daniel Luiz Reis Simas, Antonio Jorge Ribeiro da Silva and Juan Francisco Pérez-Sabino

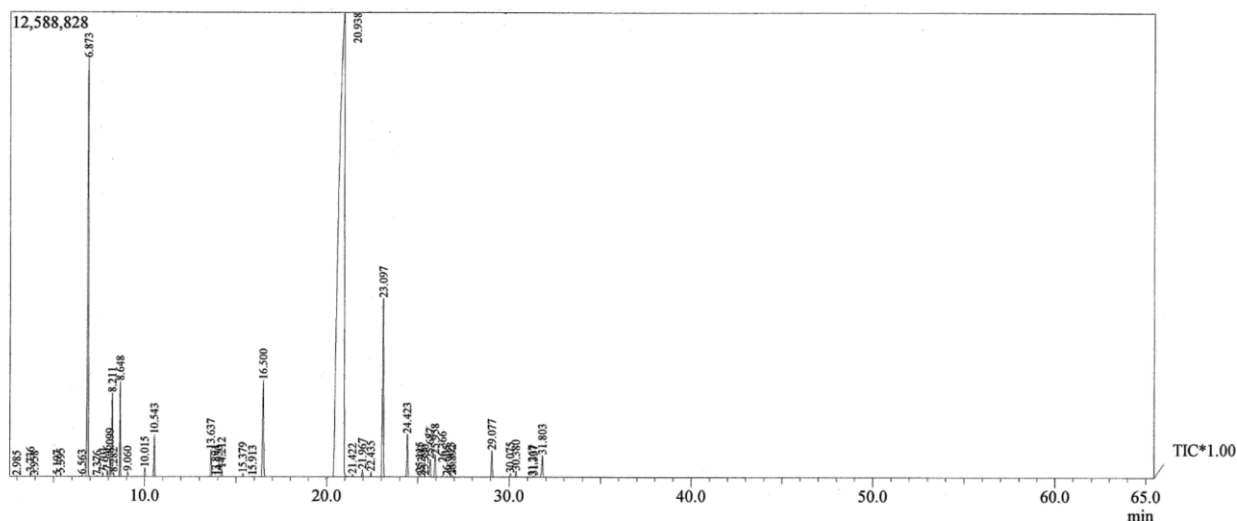

**Figure S1.** Gas chromatography coupled with mass spectrometry (GC/MS) chromatogram of the essential oil of leaves of *P. dioica*.

| Peak# | R.Time | I.Time | F.Time | Area     | Area% | Peak Report TIC |         | A/H  | Mark | Name |
|-------|--------|--------|--------|----------|-------|-----------------|---------|------|------|------|
|       |        |        |        |          |       | Height          | Height% |      |      |      |
| 1     | 2.985  | 2.958  | 3.008  | 17317    | 0.00  | 11694           | 0.03    | 1.48 |      |      |
| 2     | 3.736  | 3.700  | 3.792  | 227424   | 0.06  | 113795          | 0.25    | 2.00 |      |      |
| 3     | 3.958  | 3.933  | 3.983  | 19733    | 0.01  | 13038           | 0.03    | 1.51 |      |      |
| 4     | 5.197  | 5.167  | 5.233  | 43621    | 0.01  | 23061           | 0.05    | 1.89 |      |      |
| 5     | 5.395  | 5.233  | 5.433  | 147707   | 0.04  | 74779           | 0.17    | 1.98 |      |      |
| 6     | 6.563  | 6.525  | 6.600  | 94031    | 0.02  | 44964           | 0.10    | 2.09 |      |      |
| 7     | 6.873  | 6.767  | 6.925  | 38326429 | 10.03 | 11319023        | 25.23   | 3.39 |      |      |
| 8     | 7.376  | 7.342  | 7.408  | 31233    | 0.01  | 14840           | 0.03    | 2.10 |      |      |
| 9     | 7.701  | 7.658  | 7.742  | 248660   | 0.07  | 107765          | 0.24    | 2.31 |      |      |
| 10    | 7.946  | 7.892  | 8.000  | 385934   | 0.10  | 160926          | 0.36    | 2.40 |      |      |
| 11    | 8.099  | 8.042  | 8.142  | 1564516  | 0.41  | 622839          | 1.39    | 2.51 |      |      |
| 12    | 8.211  | 8.142  | 8.258  | 5958830  | 1.56  | 2276075         | 5.07    | 2.62 | V    |      |
| 13    | 8.282  | 8.258  | 8.325  | 216660   | 0.06  | 103342          | 0.23    | 2.10 | V    |      |
| 14    | 8.648  | 8.575  | 8.708  | 6681130  | 1.75  | 2592059         | 5.78    | 2.58 |      |      |
| 15    | 9.060  | 9.008  | 9.108  | 341917   | 0.09  | 138183          | 0.31    | 2.47 |      |      |
| 16    | 10.015 | 9.958  | 10.092 | 641894   | 0.17  | 244328          | 0.54    | 2.63 |      |      |
| 17    | 10.543 | 10.475 | 10.608 | 3132999  | 0.82  | 1149280         | 2.56    | 2.73 |      |      |
| 18    | 13.637 | 13.567 | 13.700 | 2172847  | 0.57  | 727401          | 1.62    | 2.99 |      |      |
| 19    | 13.891 | 13.842 | 13.942 | 43285    | 0.01  | 14931           | 0.03    | 2.90 |      |      |
| 20    | 14.050 | 13.942 | 14.158 | 35878    | 0.01  | 12474           | 0.03    | 2.88 |      |      |
| 21    | 14.212 | 14.158 | 14.275 | 677724   | 0.18  | 227050          | 0.51    | 2.98 |      |      |
| 22    | 15.379 | 15.325 | 15.458 | 282323   | 0.07  | 93788           | 0.21    | 3.01 |      |      |
| 23    | 15.913 | 15.875 | 15.967 | 43684    | 0.01  | 14433           | 0.03    | 3.03 |      |      |
| 24    | 16.500 | 16.375 | 16.650 | 11653126 | 3.05  | 2624639         | 5.85    | 4.44 |      |      |

**Figure S2.** Report of the chromatographic results of GC/MS analysis of the essential oil of leaves of *P. dioica*.

| Peak# | R.Time | I.Time | F.Time | Area      | Area%  | Height   | Height% | A/H   | Mark | Name |
|-------|--------|--------|--------|-----------|--------|----------|---------|-------|------|------|
| 25    | 20.938 | 20.342 | 21.158 | 272656625 | 71.37  | 12579822 | 28.04   | 21.67 |      |      |
| 26    | 21.422 | 21.367 | 21.475 | 206758    | 0.05   | 71090    | 0.16    | 2.91  |      |      |
| 27    | 21.967 | 21.908 | 22.025 | 633514    | 0.17   | 208006   | 0.46    | 3.05  |      |      |
| 28    | 22.435 | 22.383 | 22.500 | 399009    | 0.10   | 137042   | 0.31    | 2.91  |      |      |
| 29    | 23.097 | 22.975 | 23.167 | 19776217  | 5.18   | 4842099  | 10.79   | 4.08  |      |      |
| 30    | 24.423 | 24.333 | 24.500 | 4253518   | 1.11   | 1175536  | 2.62    | 3.62  |      |      |
| 31    | 25.115 | 25.050 | 25.167 | 355602    | 0.09   | 102056   | 0.23    | 3.48  |      |      |
| 32    | 25.200 | 25.167 | 25.233 | 53495     | 0.01   | 19874    | 0.04    | 2.69  | V    |      |
| 33    | 25.390 | 25.317 | 25.442 | 137577    | 0.04   | 41348    | 0.09    | 3.33  |      |      |
| 34    | 25.687 | 25.617 | 25.767 | 1728493   | 0.45   | 489194   | 1.09    | 3.53  |      |      |
| 35    | 25.958 | 25.767 | 26.025 | 2093033   | 0.55   | 610196   | 1.36    | 3.43  | V    |      |
| 36    | 26.366 | 26.317 | 26.467 | 159736    | 0.04   | 45333    | 0.10    | 3.52  |      |      |
| 37    | 26.605 | 26.467 | 26.650 | 61400     | 0.02   | 21059    | 0.05    | 2.92  |      |      |
| 38    | 26.823 | 26.650 | 26.867 | 362905    | 0.09   | 103521   | 0.23    | 3.51  |      |      |
| 39    | 26.892 | 26.867 | 26.967 | 133693    | 0.03   | 46318    | 0.10    | 2.89  | V    |      |
| 40    | 29.077 | 28.992 | 29.150 | 2536242   | 0.66   | 728253   | 1.62    | 3.48  |      |      |
| 41    | 30.075 | 30.017 | 30.133 | 329787    | 0.09   | 102712   | 0.23    | 3.21  |      |      |
| 42    | 30.380 | 30.308 | 30.450 | 557790    | 0.15   | 166393   | 0.37    | 3.35  |      |      |
| 43    | 31.267 | 31.225 | 31.308 | 57024     | 0.01   | 16042    | 0.04    | 3.55  |      |      |
| 44    | 31.337 | 31.308 | 31.392 | 87989     | 0.02   | 30634    | 0.07    | 2.87  | V    |      |
| 45    | 31.803 | 31.633 | 31.875 | 2488312   | 0.65   | 604894   | 1.35    | 4.11  |      |      |
|       |        |        |        | 382057621 | 100.00 | 44866129 | 100.00  |       |      |      |

Figure S3. Continuation of report of the chromatographic results of GC/MS analysis of the essential oil of leaves of *P. dioica*.

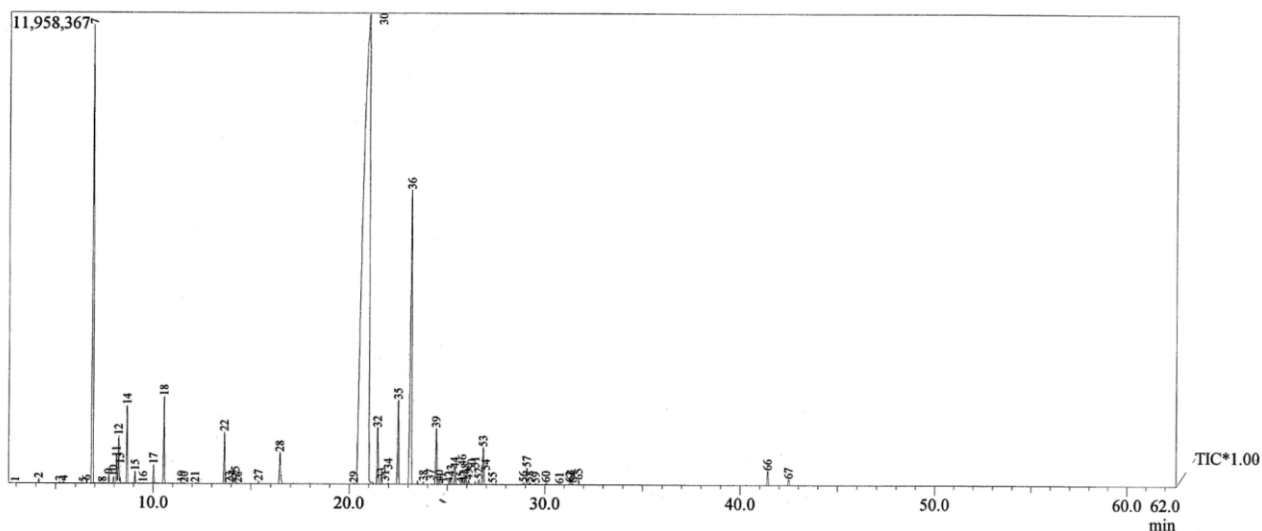

Figure S4. GC/MS chromatogram of the essential oil of leaves of *P. dioica*.

| Peak# | R.Time | I.Time | F.Time | Area     | Area% | Height   | Height% | A/H  | Mark | Name |
|-------|--------|--------|--------|----------|-------|----------|---------|------|------|------|
| 1     | 2.677  | 2.650  | 2.708  | 17385    | 0.00  | 11841    | 0.02    | 1.47 |      |      |
| 2     | 4.141  | 4.100  | 4.192  | 199540   | 0.05  | 110132   | 0.22    | 1.81 |      |      |
| 3     | 5.207  | 5.167  | 5.242  | 76991    | 0.02  | 41189    | 0.08    | 1.87 |      |      |
| 4     | 5.405  | 5.367  | 5.442  | 93840    | 0.02  | 49726    | 0.10    | 1.89 |      |      |
| 5     | 6.414  | 6.383  | 6.450  | 24952    | 0.01  | 12786    | 0.03    | 1.95 |      |      |
| 6     | 6.573  | 6.450  | 6.617  | 137579   | 0.03  | 63065    | 0.12    | 2.18 |      |      |
| 7     | 6.889  | 6.775  | 6.942  | 42250592 | 10.11 | 11641771 | 23.01   | 3.63 |      |      |
| 8     | 7.385  | 7.350  | 7.425  | 56647    | 0.01  | 25131    | 0.05    | 2.25 |      |      |
| 9     | 7.711  | 7.667  | 7.758  | 519786   | 0.12  | 219227   | 0.43    | 2.37 |      |      |
| 10    | 7.955  | 7.900  | 8.008  | 411343   | 0.10  | 171333   | 0.34    | 2.40 |      |      |
| 11    | 8.107  | 8.050  | 8.150  | 1678777  | 0.40  | 652863   | 1.29    | 2.57 |      |      |
| 12    | 8.216  | 8.150  | 8.267  | 3265155  | 0.78  | 1209370  | 2.39    | 2.70 | V    |      |
| 13    | 8.290  | 8.267  | 8.342  | 304616   | 0.07  | 143899   | 0.28    | 2.12 | V    |      |
| 14    | 8.655  | 8.583  | 8.717  | 5235947  | 1.25  | 1986062  | 3.93    | 2.64 |      |      |
| 15    | 9.069  | 9.017  | 9.125  | 780580   | 0.19  | 310149   | 0.61    | 2.52 |      |      |
| 16    | 9.498  | 9.467  | 9.533  | 25480    | 0.01  | 12180    | 0.02    | 2.09 |      |      |
| 17    | 10.024 | 9.967  | 10.117 | 1333812  | 0.32  | 479430   | 0.95    | 2.78 |      |      |
| 18    | 10.563 | 10.475 | 10.642 | 6497505  | 1.55  | 2207594  | 4.36    | 2.94 |      |      |
| 19    | 11.475 | 11.442 | 11.517 | 49585    | 0.01  | 24661    | 0.05    | 2.01 |      |      |
| 20    | 11.601 | 11.567 | 11.633 | 20129    | 0.00  | 9629     | 0.02    | 2.09 |      |      |
| 21    | 12.157 | 12.125 | 12.192 | 28106    | 0.01  | 15996    | 0.03    | 1.76 |      |      |
| 22    | 13.650 | 13.575 | 13.717 | 4030580  | 0.96  | 1318339  | 2.61    | 3.06 |      |      |
| 23    | 13.895 | 13.850 | 13.950 | 52044    | 0.01  | 18004    | 0.04    | 2.89 |      |      |
| 24    | 14.064 | 13.950 | 14.125 | 159851   | 0.04  | 54399    | 0.11    | 2.94 |      |      |

**Figure S5.** Report of the chromatographic results of GC/MS analysis of the essential oil of fruits of *P. dioica*.

| Peak# | R.Time | L.Time | F.Time | Area      | Area%  | Height   | Height% | A/H   | Mark | Name |
|-------|--------|--------|--------|-----------|--------|----------|---------|-------|------|------|
| 25    | 14.217 | 14.125 | 14.300 | 447491    | 0.11   | 149760   | 0.30    | 2.99  |      |      |
| 26    | 14.337 | 14.300 | 14.375 | 24396     | 0.01   | 11727    | 0.02    | 2.08  |      |      |
| 27    | 15.383 | 15.333 | 15.458 | 193997    | 0.05   | 68431    | 0.14    | 2.83  |      |      |
| 28    | 16.472 | 16.392 | 16.625 | 3308345   | 0.79   | 806145   | 1.59    | 4.10  |      |      |
| 29    | 20.244 | 20.192 | 20.292 | 65222     | 0.02   | 23028    | 0.05    | 2.83  |      |      |
| 30    | 20.971 | 20.350 | 21.075 | 275548084 | 65.91  | 11958367 | 23.64   | 23.04 |      |      |
| 31    | 21.149 | 21.075 | 21.317 | 459289    | 0.11   | 61003    | 0.12    | 7.53  | V    |      |
| 32    | 21.446 | 21.317 | 21.542 | 5019821   | 1.20   | 1438204  | 2.84    | 3.49  | V    |      |
| 33    | 21.646 | 21.542 | 21.708 | 382743    | 0.09   | 125813   | 0.25    | 3.04  | V    |      |
| 34    | 21.981 | 21.942 | 22.025 | 69680     | 0.02   | 25646    | 0.05    | 2.72  |      |      |
| 35    | 22.489 | 22.383 | 22.558 | 7829388   | 1.87   | 2146585  | 4.24    | 3.65  |      |      |
| 36    | 23.144 | 22.983 | 23.208 | 38172404  | 9.13   | 7442147  | 14.71   | 5.13  |      |      |
| 37    | 23.471 | 23.408 | 23.525 | 303184    | 0.07   | 95258    | 0.19    | 3.18  |      |      |
| 38    | 23.777 | 23.733 | 23.833 | 191876    | 0.05   | 66180    | 0.13    | 2.90  |      |      |
| 39    | 24.437 | 24.342 | 24.517 | 5174729   | 1.24   | 1430826  | 2.83    | 3.62  |      |      |
| 40    | 24.585 | 24.517 | 24.633 | 222894    | 0.05   | 72266    | 0.14    | 3.08  |      |      |
| 41    | 24.692 | 24.633 | 24.733 | 43461     | 0.01   | 12595    | 0.02    | 3.45  | V    |      |
| 42    | 25.082 | 25.033 | 25.133 | 101560    | 0.02   | 34614    | 0.07    | 2.93  |      |      |
| 43    | 25.200 | 25.133 | 25.267 | 678219    | 0.16   | 199484   | 0.39    | 3.40  | V    |      |
| 44    | 25.403 | 25.267 | 25.475 | 1472204   | 0.35   | 401660   | 0.79    | 3.67  |      |      |
| 45    | 25.683 | 25.625 | 25.717 | 112511    | 0.03   | 35503    | 0.07    | 3.17  |      |      |
| 46    | 25.776 | 25.717 | 25.825 | 466412    | 0.11   | 132333   | 0.26    | 3.52  | V    |      |
| 47    | 25.858 | 25.825 | 25.892 | 167469    | 0.04   | 53495    | 0.11    | 3.13  | V    |      |
| 48    | 25.948 | 25.892 | 26.025 | 895600    | 0.21   | 243682   | 0.48    | 3.68  | V    |      |
| 49    | 26.101 | 26.025 | 26.183 | 389193    | 0.09   | 112567   | 0.22    | 3.46  | V    |      |
| 50    | 26.258 | 26.183 | 26.292 | 36327     | 0.01   | 13110    | 0.03    | 2.77  |      |      |
| 51    | 26.434 | 26.375 | 26.492 | 250363    | 0.06   | 78619    | 0.16    | 3.18  |      |      |
| 52    | 26.618 | 26.492 | 26.683 | 433560    | 0.10   | 131453   | 0.26    | 3.30  |      |      |
| 53    | 26.839 | 26.683 | 26.925 | 3365141   | 0.80   | 950278   | 1.88    | 3.54  | V    |      |
| 54    | 26.983 | 26.925 | 27.025 | 58381     | 0.01   | 14266    | 0.03    | 4.09  | V    |      |
| 55    | 27.334 | 27.283 | 27.383 | 69827     | 0.02   | 23942    | 0.05    | 2.92  |      |      |
| 56    | 28.910 | 28.833 | 28.958 | 127330    | 0.03   | 48359    | 0.10    | 2.63  |      |      |
| 57    | 29.079 | 28.958 | 29.150 | 1538820   | 0.37   | 432101   | 0.85    | 3.56  |      |      |
| 58    | 29.228 | 29.175 | 29.283 | 167974    | 0.04   | 57163    | 0.11    | 2.94  |      |      |
| 59    | 29.536 | 29.492 | 29.575 | 86207     | 0.02   | 31975    | 0.06    | 2.70  |      |      |
| 60    | 30.075 | 30.000 | 30.125 | 147144    | 0.04   | 45610    | 0.09    | 3.23  |      |      |
| 61    | 30.765 | 30.708 | 30.808 | 47475     | 0.01   | 17321    | 0.03    | 2.74  |      |      |
| 62    | 31.283 | 31.225 | 31.308 | 167692    | 0.04   | 50537    | 0.10    | 3.32  |      |      |
| 63    | 31.344 | 31.308 | 31.392 | 276255    | 0.07   | 84121    | 0.17    | 3.28  | V    |      |
| 64    | 31.444 | 31.392 | 31.492 | 98702     | 0.02   | 34016    | 0.07    | 2.90  | V    |      |
| 65    | 31.735 | 31.650 | 31.825 | 456154    | 0.11   | 115857   | 0.23    | 3.94  |      |      |
| 66    | 41.411 | 41.333 | 41.483 | 1257238   | 0.30   | 368481   | 0.73    | 3.41  |      |      |
| 67    | 42.488 | 42.417 | 42.558 | 512253    | 0.12   | 153580   | 0.30    | 3.34  |      |      |
|       |        |        |        | 418087837 | 100.00 | 50586884 | 100.00  |       |      |      |

**Figure S6.** Continuation of report of the chromatographic results of GC/MS analysis of the essential oil of fruits of *P. dioica*.
